# Supplementary material for: A multicenter prospective clinical trial reveals cell-free DNA methylation markers for early esophageal cancer
Source: JCI journal article supplement (doi:10.1172/jci186816), 2025-02-25
Supplement: sd1 [file 1]

301 Moved Permanently

# Moved Permanently

The document has moved here.
